# Supplementary material for: Informational Gene Phylogenies Do Not Support a Fourth Domain of Life for Nucleocytoplasmic Large DNA Viruses
Source: PubMed Central journal article supplement (PMC3116878; doi:10.1371/journal.pone.0021080), 2011-06-16

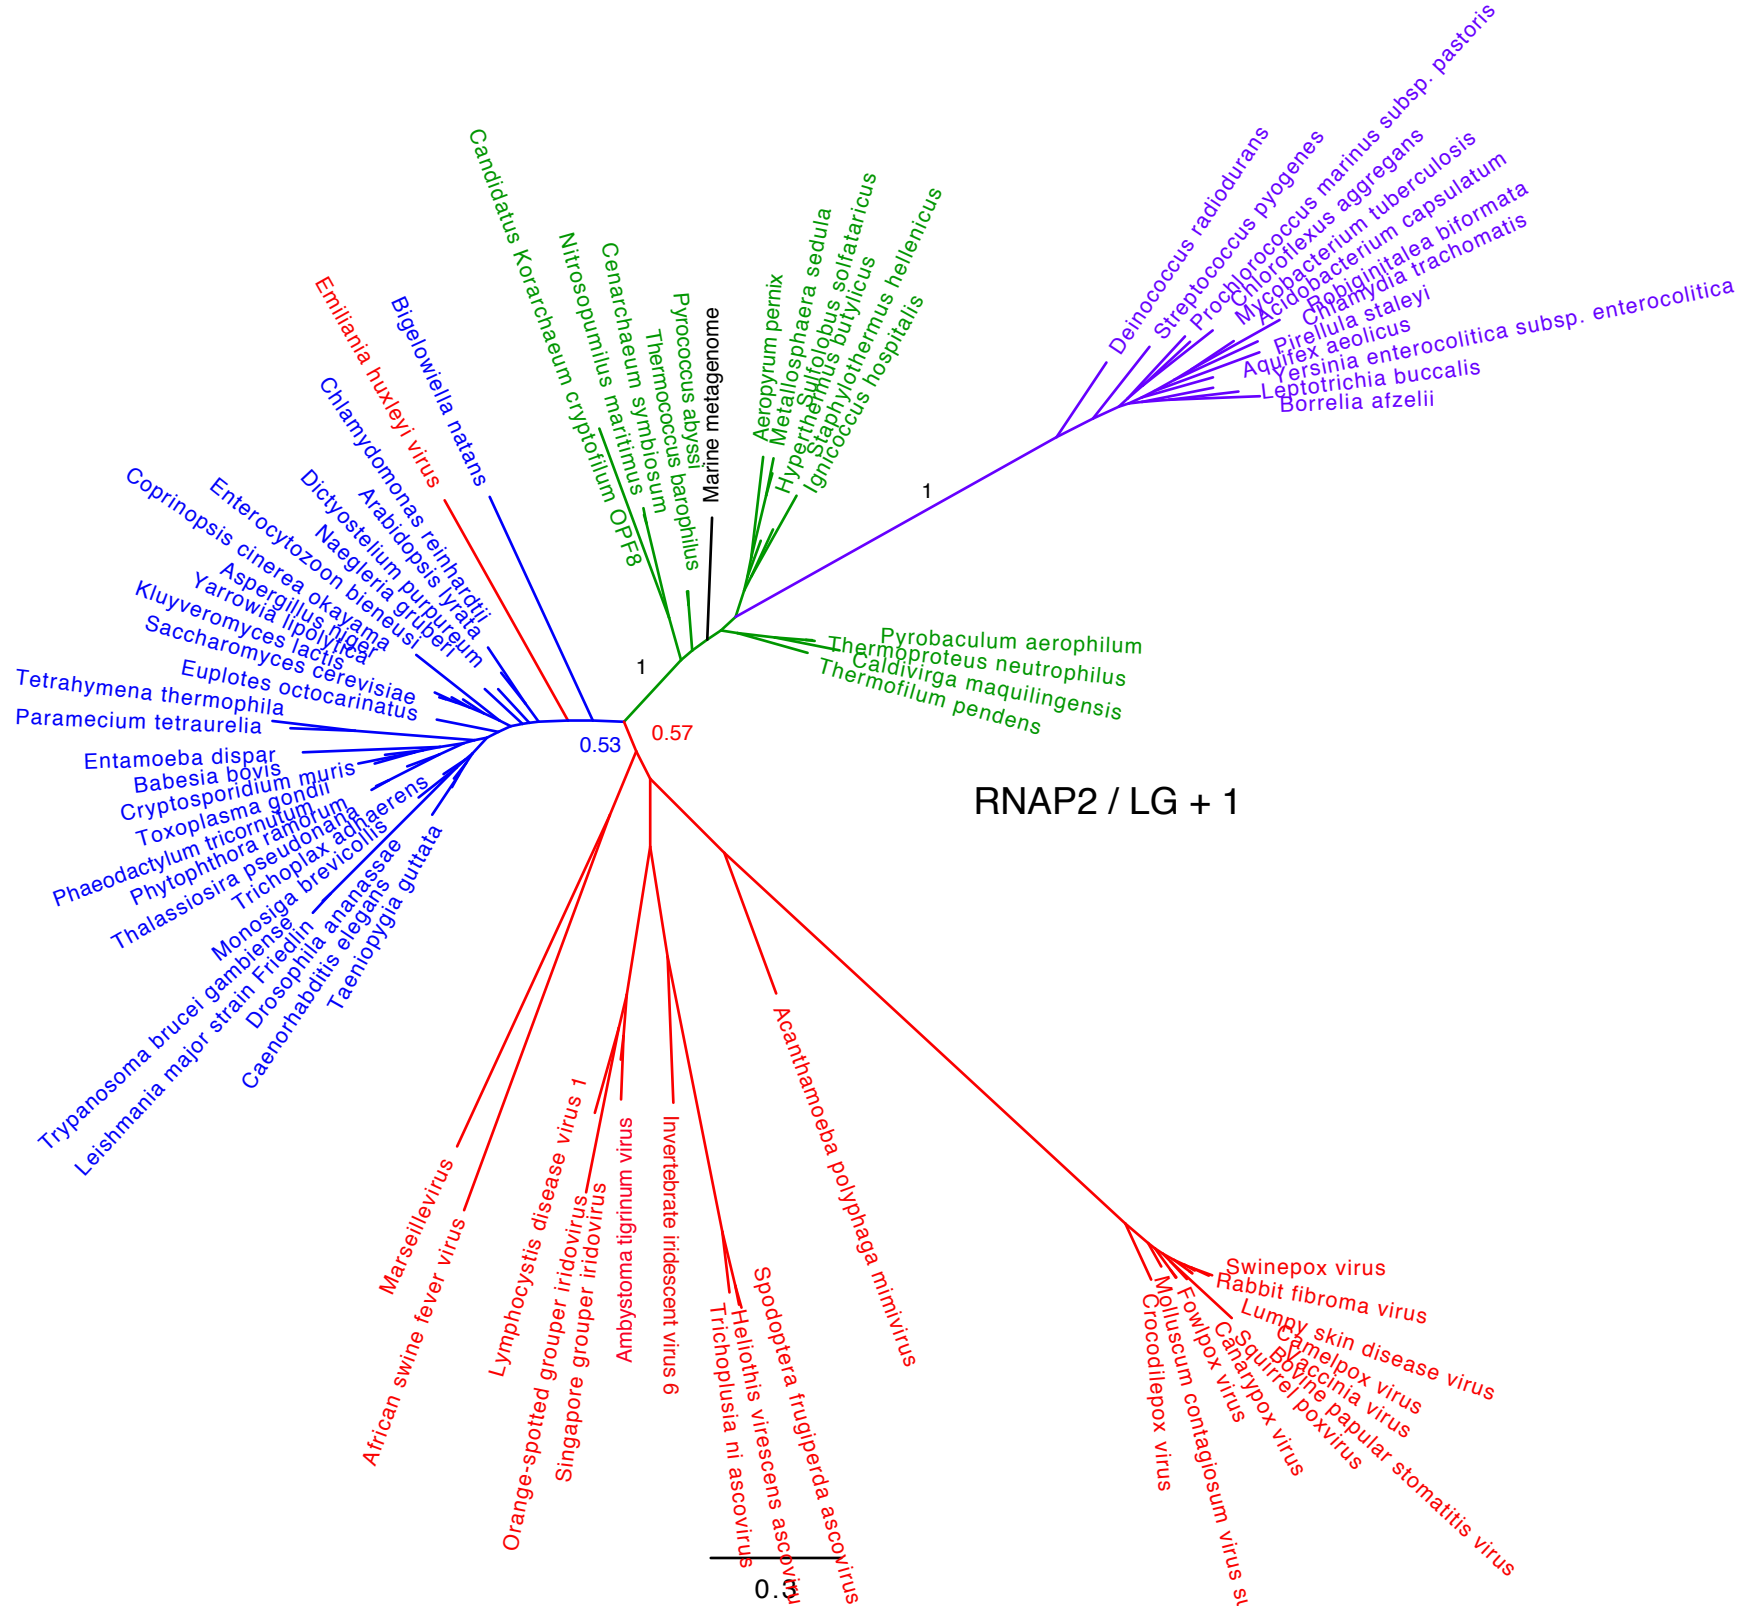

Supplement: pone.0021080.s002.pdf [file pone.0021080.s002.pdf]
