# Supplementary material for: Informational Gene Phylogenies Do Not Support a Fourth Domain of Life for Nucleocytoplasmic Large DNA Viruses
Source: PLoS One. 2011 Jun 16;6(6):e21080. doi: 10.1371/journal.pone.0021080 (PMC3116878; doi:10.1371/journal.pone.0021080)
Supplement: Table S1 — Additional statistical information. Alignment quality comparisons, model test results, tree topologies and likelihoods from our phylogenetic analyses. (XLS) [file pone.0021080.s009.xls]

## Sheet: RAxML
Alignment	Model	AIC	BIC	Support for 4D hypothesis	Likelihood
RNAP2	JTT	32583.4	33156.7	Yes	-16034
	WAG	32432.3	33005.6	No	-15903.7
	LG	32048.3	32621.7	No	-15728.5
TFIIB	JTT	15077	15314.7	No	-7446
	WAG	15006.3	15244	No	-7411.15
	LG	14942.6	15180.4	No	-7382.09
PCNA	JTT	20963	21271.6	No	-10331.2
	WAG	20891.6	21200.2	No	-10293.3
	LG	20739.5	21048.1	No	-10215.7
FEN	JTT	23557.2	23864	No	-11651.9
	WAG	23357.2	23664	Yes	-11553.6
	LG	23222.9	23529.6	Yes	-11491.4

## Sheet: p4
Alignment	Model	Comp. hetero.					Support for 4D hypothesis
		Mean	SD	Real	P
RNAP2 GB	JTT	794.898	74.2316	969.226	0.015	Fail	Yes
	WAG	816.644	74.999	969.226	0.03	Fail	Yes
	LG	829.554	76.939	969.226	0.0416	Fail	Yes
	LG+1	927.396	93.7358	969.226	0.3062	Pass	Yes
	Dayhoff	208.115	35.0954	186.415	0.6955	Pass	No
TFIIB GB	JTT	389.838	37.3783	533.117	0	Fail	No
	WAG	397.04	36.6334	533.117	0	Fail	No
	LG	391.002	35.17	533.117	0	Fail	No
	LG+1	452.86	43.4959	533.117	0.0316	Fail	No
	LG+2	482.236	55.3645	533.117	0.1714	Pass	No
	Dayhoff	84.471	15.7302	75.0653	0.7072	Pass	No
PCNA GB	JTT	549.252	41.1203	828.281	0	Fail	No
	WAG	547.471	41.0208	828.281	0	Fail	No
	LG	545.456	40.5808	828.281	0	Fail	No
	LG+1	646.085	52.8468	828.281	0.0017	Fail	No
	LG+2	699.99	61.4504	828.281	0.025	Fail	No
	Dayhoff	122.612	18.5054	173.294	0.0083	Fail	No
	Dayhoff+1_2	161.968	28.8078	173.294	0.3311	Pass	No
FEN GB	JTT	399.646	33.7476	659.456	0	Fail	No
	WAG	399.102	33.2407	659.456	0	Fail	Yes
	LG	408.312	33.8022	659.456	0	Fail	Yes
	LG+1	475.853	41.0735	659.456	0	Fail	Yes
	LG+2	526.593	48.4704	659.456	0.0067	Fail	Yes
	Dayhoff	92.7956	15.1078	161.353	0.0017	Fail	No
	Dayhoff+1	122.682	25.4573	161.353	0.0715	Pass	No

## Sheet: PhyloBayes
Alignment	Model	Site-specific amino acid biodiversity (residues/site)				Homoplasy (o)		Homoplasy (predicted)		P	Support for 4D hypothesis
		Real	Mean	SD	P	Mean	SD	Mean	SD
RNAP2	JTT	5.79779	7.06864	0.125985	0	12.8268	0.393672	11.9495	0.556467	0.0183028	Yes
	WAG		7.13742	0.128192	0	11.8385	0.367673	10.6591	0.519158	0.00182315	No
	LG		6.93637	0.13004	0	13.2342	0.471421	12.6236	0.63871	0.0840108	No
	UL3		6.3083	0.127299	0	14.6627	0.556656	14.2297	0.723669	0.165072	No
	CAT10		6.20615	0.104181	0	12.539	0.491736	12.1177	0.58705	0.10026	No
	CAT60		5.94105	0.100768	0.074331	13.5566	0.564021	13.4958	0.673252	0.389471	No
TFIIB	JTT	7.01235	7.73353	0.163617	0	11.5895	0.568475	11.0319	0.69519	0.109712	No
	WAG		7.71688	0.169858	0	10.2255	0.485309	9.54866	0.643668	0.0619017	No
	LG		7.60409	0.169984	0	12.4582	0.614555	12.2542	0.776187	0.348059	No
	UL3		7.17724	0.169412	0.157687	16.8394	1.12329	16.7624	1.22551	0.43364	No
	CAT10		7.02341	0.136527	0.0810085	12.3377	0.983471	12.3461	1.0722	0.501818	No
	CAT60		6.82467	0.139008	0.906118	16.7113	1.92884	16.9508	1.98663	0.678023	No
FEN	JTT	6.8093	8.06478	0.152231	0	13.5713	0.458656	12.824	0.620842	0.0442514	No
	WAG		8.04854	0.151372	0	11.858	0.360168	10.7604	0.52136	0.00279553	No
	LG		7.89406	0.150847	0	13.9499	0.473465	13.4989	0.649507	0.155827	No
	UL3		7.38767	0.143503	0	19.185	0.862062	19.4914	1.02109	0.713437	No
	CAT10		7.10036	0.125805	0.0113491	13.503	0.685491	13.3744	0.785067	0.363086	No
	CAT60		6.89446	0.126176	0.247841	16.2388	1.10312	16.3458	1.18085	0.59294	No
PCNA	JTT	7.74719	8.6971	0.15676	0	20.5288	0.868044	19.3717	1.04218	0.026926	No
	WAG		8.66886	0.158192	0	18.4462	0.718224	17.1817	0.928533	0.0152838	No
	LG		8.46986	0.159265	0	21.8128	0.972405	21.0632	1.18853	0.116601	No
	UL3		7.75695	0.149531	0.4602	27.3493	1.5579	26.0441	1.64375	0.0500472	No
	CAT10		7.4301	0.130479	0.991453	19.6872	1.16537	19.7019	1.26577	0.501709	No
	CAT60		7.43176	0.130296	0.99154	23.0687	1.60012	23.3109	1.68271	0.662365	No

## Sheet: Alignment quality
	Heads-or-Tails
	Total identical columns	Total identical pairs
RNAP2 GB	0.9114	0.9965
RNAP2 MAN	0.482	0.9538
TFIIB GB	0.7864	0.9724
TFIIB MAN	0.6215	0.9352
FEN GB	0.7116	0.9809
FEN MAN	0.5613	0.956
PCNA GB	0.6176	0.9608
PCNA MAN	0.525	0.9544
